# Supplementary material for: SMAD4 and NF1 mutations as potential biomarkers for poor prognosis to cetuximab-based therapy in Chinese metastatic colorectal cancer patients
Source: BMC Cancer. 2018 Apr 27;18:479. doi: 10.1186/s12885-018-4298-5 (PMC5921972; doi:10.1186/s12885-018-4298-5)
Supplement: Supplementary file 1 — Table S1. Clinical characteristics of the 33 Chinese mCRC patients enrolled in this study. (XLSX 12 kb) [file 12885_2018_4298_MOESM1_ESM.xlsx]

## Sheet: Sheet1
	Table S1: Clinical characteristics of the 33 Chinese mCRC patients enrolled in this study.
Patient ID	Gender	Age range	Primary tumor location	PFS(days)	Treatement line	Liver metastasis	Histological type	Response	ECOG score	Number of metastatic sites
1	M	20-24	colon	12	1st	yes	ade1	PD	2	>=3
2	M	20-24	colon	37	1st	no	ade	PD	1	<3
3	M	35-39	rectum	53	2nd or later	yes	muc2	PD	2	<3
4	M	60-64	rectum	59	1st	no	ade	PD	2	<3
5	F	80-84	colon	70	1st	no	ade	PD	1	<3
6	M	60-64	colon	78	1st	no	ade	PD	0	<3
7	M	30-34	colon	82	1st	no	muc	PD	1	<3
8	F	55-59	rectum	89	2nd or later	yes	ade	PD	1	>=3
9	M	55-59	rectum	98	1st	no	ade	SD	0	<3
10	F	65-69	rectum	99	1st	no	ade	SD	0	>=3
11	M	45-49	colon	118	1st	no	ade	SD	0	<3
12	F	60-64	colon	131	2nd or later	no	ade	SD	0	>=3
13	M	70-74	colon	134	1st	yes	ade	SD	0	<3
14	F	60-64	rectum	153	2nd or later	yes	ade	PR	1	<3
15	M	75-79	colon	168	1st	yes	ade	SD	0	<3
16	M	55-59	colon	187	1st	no	ade	SD	0	<3
17	M	50-54	colon	211	1st	yes	ade	SD	0	<3
18	M	65-69	colon	211	1st	yes	ade	SD	0	>=3
19	M	40-44	colon	233	1st	yes	ade	SD	0	>=3
20	M	40-44	rectum	250	2nd or later	yes	ade	SD	0	<3
21	F	55-59	colon	251	1st	yes	ade	SD	0	<3
22	M	40-44	colon	261	1st	yes	ade	SD	0	<3
23	F	25-29	colon	264	1st	yes	ade	PR	0	<3
24	M	55-59	rectum	269	1st	no	ade	CR	1	<3
25	F	55-59	colon	282	1st	yes	ade	PR	1	<3
26	M	15-19	colon	317	1st	no	muc	SD	1	<3
27	M	45-49	rectum	382	1st	yes	ade	SD	0	<3
28	M	50-54	colon	407	1st	yes	ade	SD	1	<3
29	M	50-54	colon	556	1st	yes	ade	PR	0	<3
30	M	65-69	colon	563	2nd or later	no	ade	SD	0	>=3
31	F	50-55	colon	614	1st	no	ade	PR	0	<3
32	M	70-74	colon	650	1st	yes	ade	SD	0	<3
33	M	55-59	rectum	959	1st	yes	ade	CR	0	<3
1ade: adenocarcinoma; 2muc: mucinous adenocarcinoma;
